# Supplementary material for: Green transformation of biomass-derived Indian gooseberry into fluorescent intrinsic nitrogen-functionalized carbon quantum dots for real-time detection of vitamin B2 in the nanomolar range
Source: Royal Society of Chemistry journal article supplement (doi:10.1039/d3su00456b), 2024-01-01
Supplement: d3su00456b1.pdf [file d3su00456b1.pdf]

M. Kaur, M. Bhattacharya, and B. Maity

**Green Transformation of Biomass-Derived Indian Gooseberry into Fluorescent Intrinsic Nitrogen-Functionalized Carbon Quantum Dots for Real-Time Detection of Vitamin B<sub>2</sub> in Nanomolar Range**

Mandeep Kaur, Mily Bhattacharya\*, Banibrata Maity\*

*Department of Chemistry and Biochemistry, Thapar Institute of Engineering and Technology  
Patiala 147004, India*

\*Corresponding Authors

Mily Bhattacharya and Banibrata Maity

Email: [mily.bhattacharya@thapar.edu](mailto:mily.bhattacharya@thapar.edu) and [banibrata.maity@thapar.edu](mailto:banibrata.maity@thapar.edu)

**Figure S1**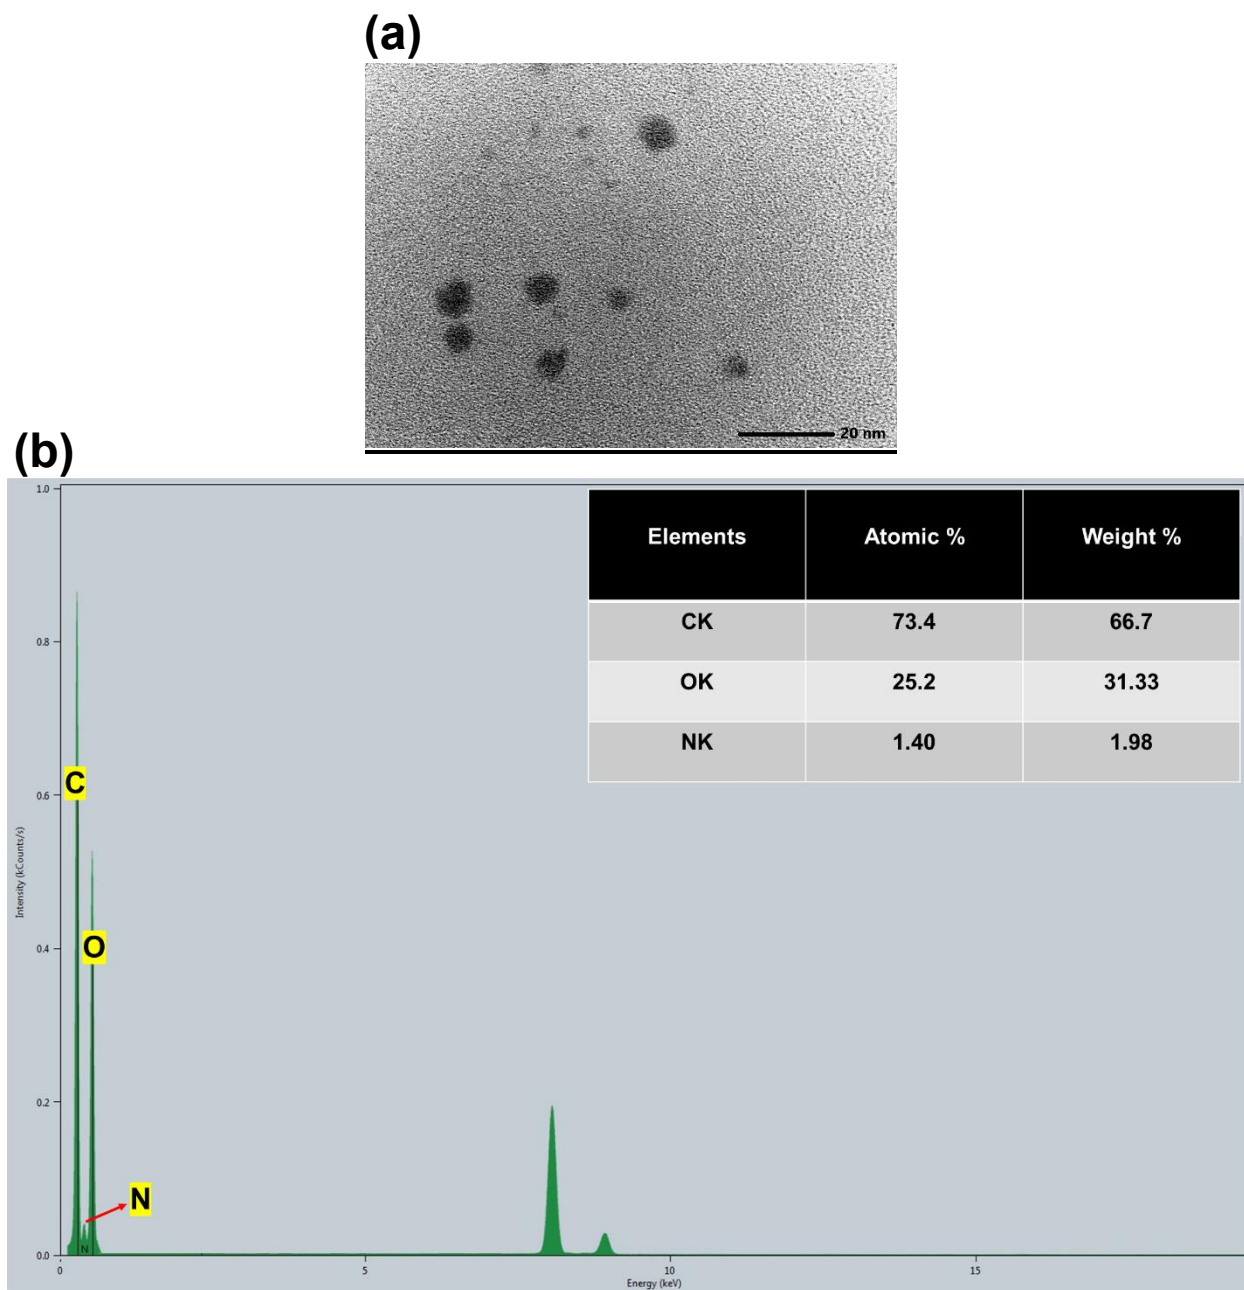

**Figure S1.** (a) HR-TEM image of N-CQDs, (b) Energy dispersive spectroscopy (EDS) spectrum of N-CQDs showing the presence of different elements on the surface of N-CQDs. The table (inset) denotes the percentage composition of each element present in the N-CQDs.

**Figure S2**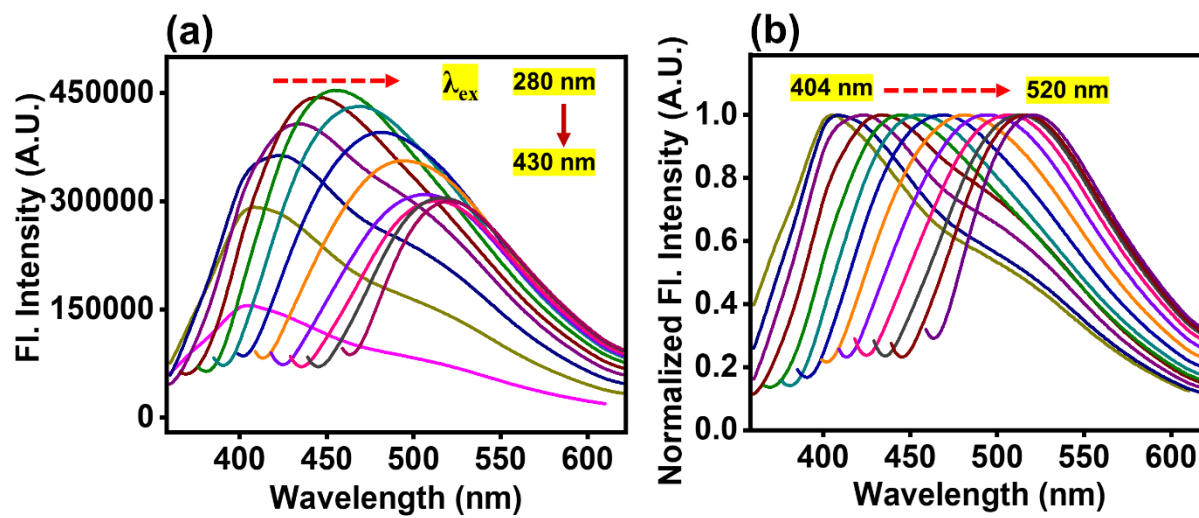

**Figure S2.** Excitation wavelength-dependent (a) changes in fluorescence emission spectra and (b) Peak position-normalized fluorescence emission of N-CQDs clearly depicting the spectral shift from 404 nm to 520 nm in pH 7.4 HEPES buffer. The red dashed-arrow indicates a red-shift in the fluorescence emission upon changing the excitation wavelength ( $\lambda_{ex}$ : 280 nm to 430 nm).

**Figure S3**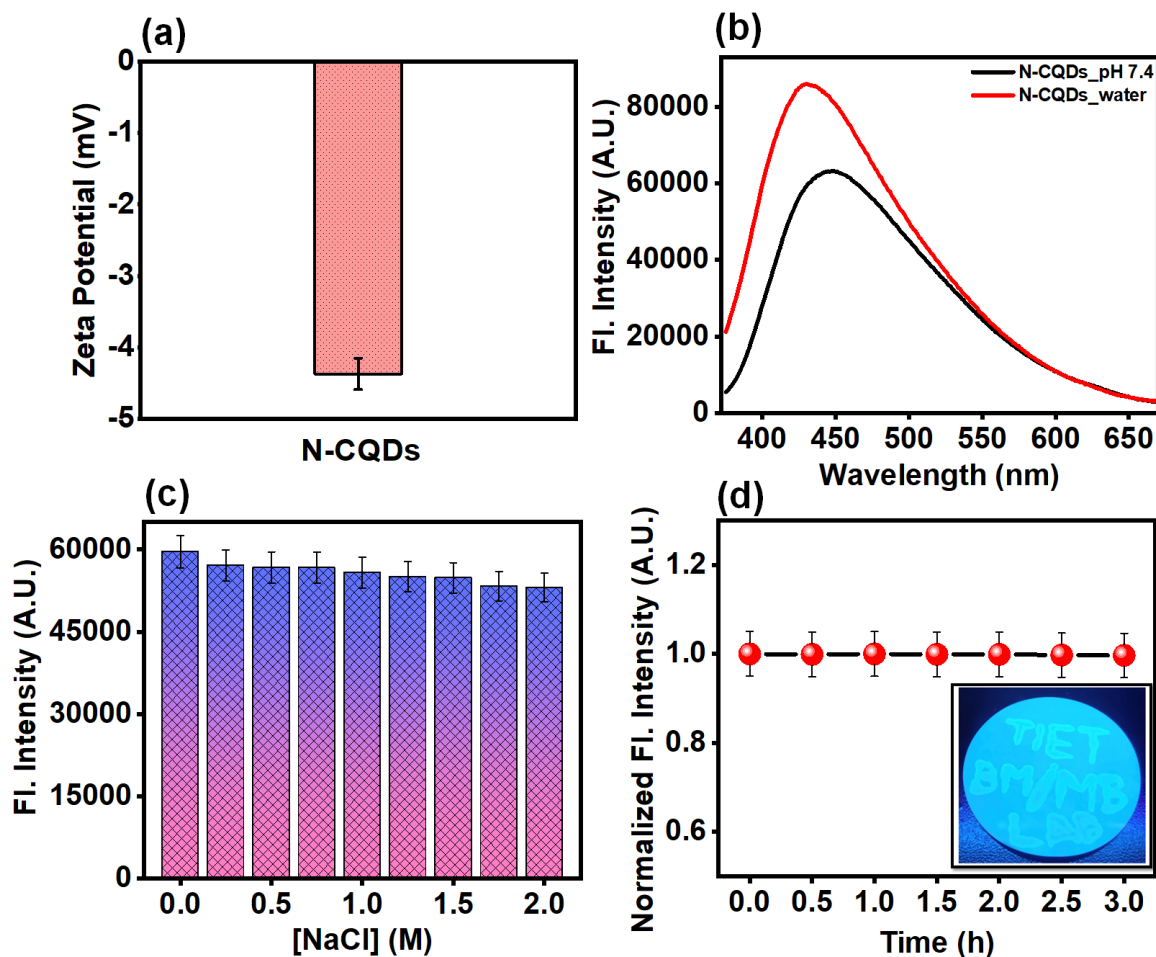

**Figure S3.** (a) Zeta potential of N-CQDs, (b) FL intensity of N-CQDs in aqueous and HEPES buffer at pH 7.4 (c) impact of ionic strength of the medium on N-CQDs emission at 430 nm in the presence of variable concentrations of NaCl (0-2 M) and (d) impact of photo-irradiation by a xenon arc lamp on the emission of N-CQDs at 430 nm as a function of time, (inset) photograph demonstrates practical utility of N-CQDs as a fluorescent ink. Error bars represents standard error of measurements obtained from three independent experiments.

**Figure S4**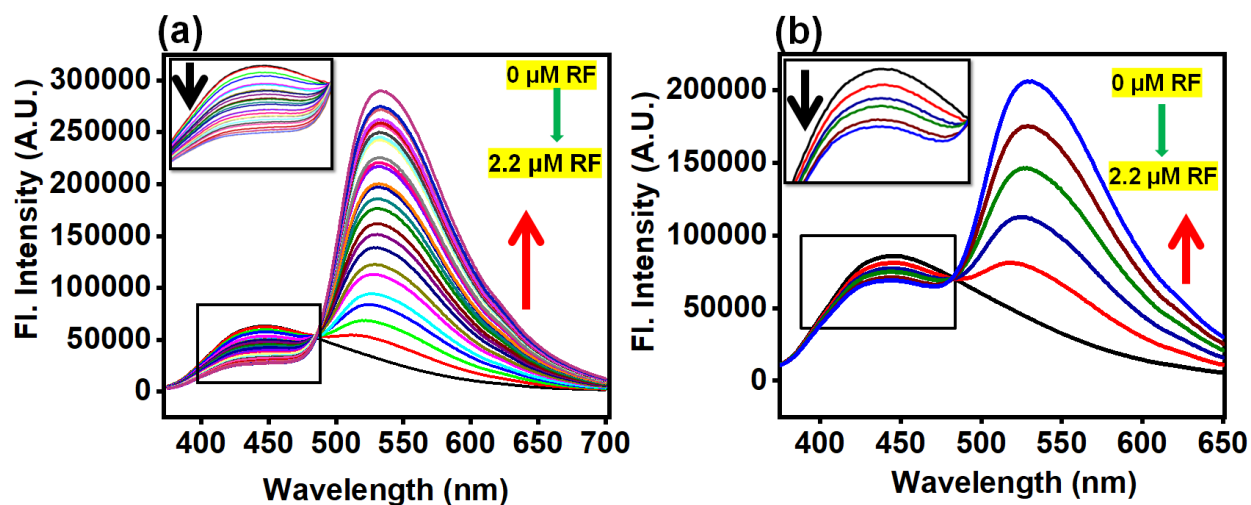

**Figure S4.** Variation in fluorescence emission of N-CQDs in the presence of different concentrations of RF (0-2.2 μM) with inset image showing fluorescence quenching (a) in HEPES buffer at pH 7.4 and (b) upon addition of a real sample of Vitamin B<sub>2</sub>. Black arrow depicts the progressive decrease of fl. intensity of N-CQDs at shorter emission wavelength, while steady increase at longer emission wavelength is represented by red arrow.

**Figure S5**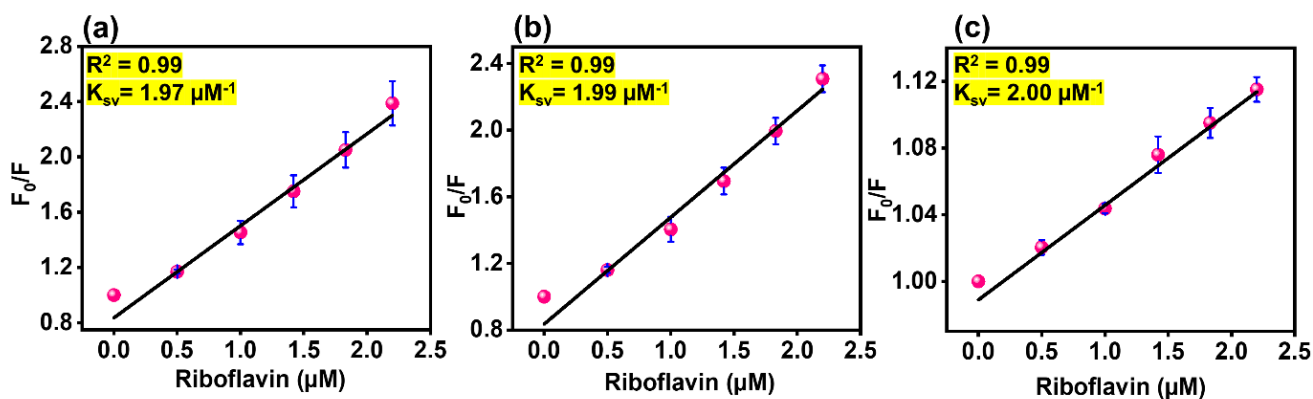

**Figure S5.** Stern-Volmer plots of N-CQDs in (a) aqueous medium, (b) HEPES buffer at pH 7.4 and (c) real sample of vitamin B<sub>2</sub>. The parameters ' $F_0$ ' and ' $F$ ' indicate the fluorescence intensity in the absence and presence of vitamin B<sub>2</sub>, respectively. ' $K_{sv}$ ' signifies Stern-Volmer quenching constant, which was estimated from the slope of the plots. The black line indicates the linear fit of the data using OriginPro 2021 and  $R^2$  denotes the goodness of the fits. Error bars represents standard error of measurements obtained from three independent experiments.

**Figure S6**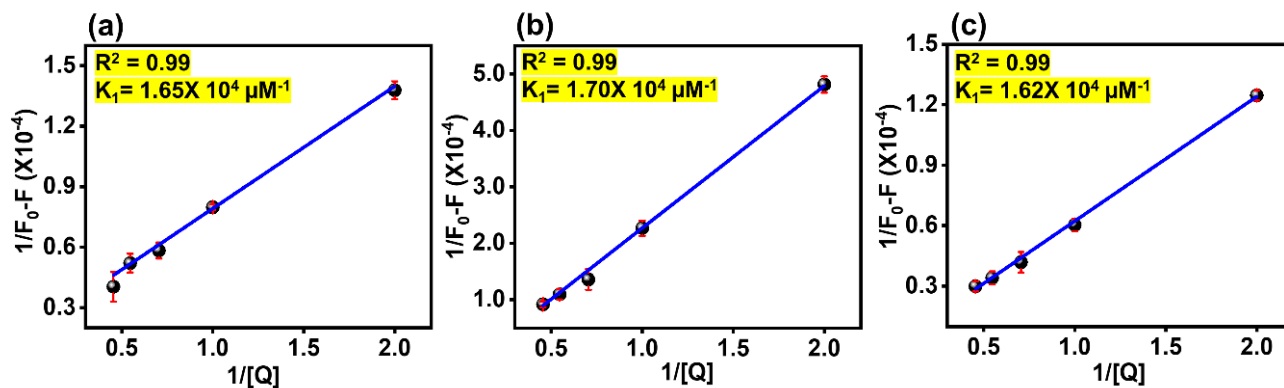

**Figure S6.** Benesi-Hildebrand plot of N-CQDs in (a) aqueous medium, (b) HEPES buffer medium at pH 7.4 and (c) real sample of vitamin B<sub>2</sub>. The parameters ' $F_0$ ' and ' $F$ ' indicate the fluorescence intensity in the absence and presence of vitamin B<sub>2</sub>, respectively.  $Q$  indicates the concentration of the quencher (i.e. vitamin B<sub>2</sub>) and  $K_1$  depicts the binding constant, which was estimated from the reciprocal of the slope of the plots. The blue line indicates the linear fit of the data using OriginPro 2021 and  $R^2$  denotes the goodness of the fits. Error bars represents standard error of measurements obtained from three independent experiments.

**Figure S7**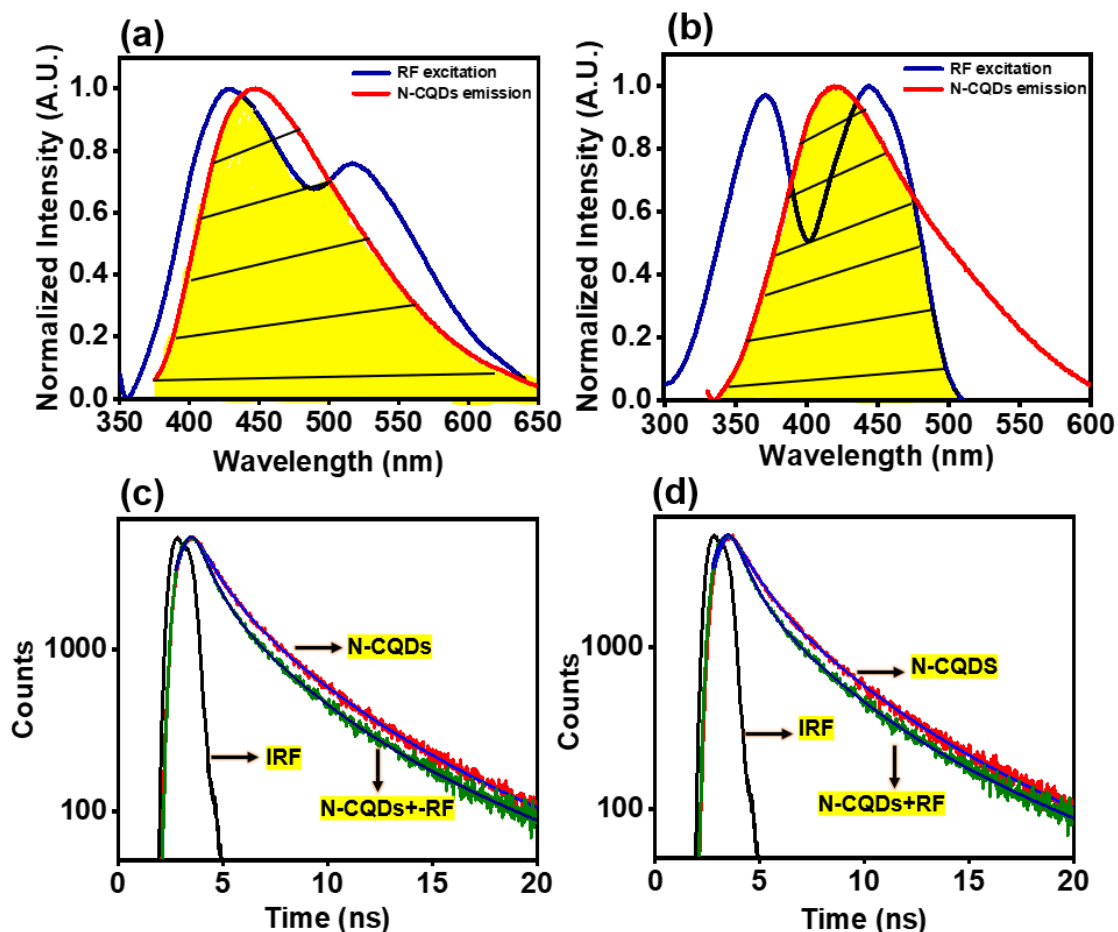

**Figure S7.** Spectral overlap between emission spectrum of N-CQDs (red) and excitation spectrum of RF (blue) where the yellow color demonstrates the overlapped region in (a) HEPES buffer at pH 7.4, (b) real sample of Vitamin B<sub>2</sub>, (c) Fluorescence lifetime decays of N-CQDs in pH 7.4 HEPES buffer where, the sharp, thin black line represents the instrument response function, the red and olive lines represent the actual intensity decays in the absence and presence of RF respectively. The blue and royal blue lines correspond to fits obtained in the absence and presence of RF, respectively using tri-exponential function (See eq. 3; Experimental Section), (d) Fluorescence lifetime decays of N-CQDs in the presence of a real sample of Vitamin B<sub>2</sub> where, the sharp, thin black line represents the instrument response function, the red and olive lines represent the actual intensity decays in the absence and presence of RF respectively. The blue and royal blue lines correspond to fits obtained in the absence and presence of RF, respectively using tri-exponential function (See eq. 3; Experimental Section).



**Figure S8**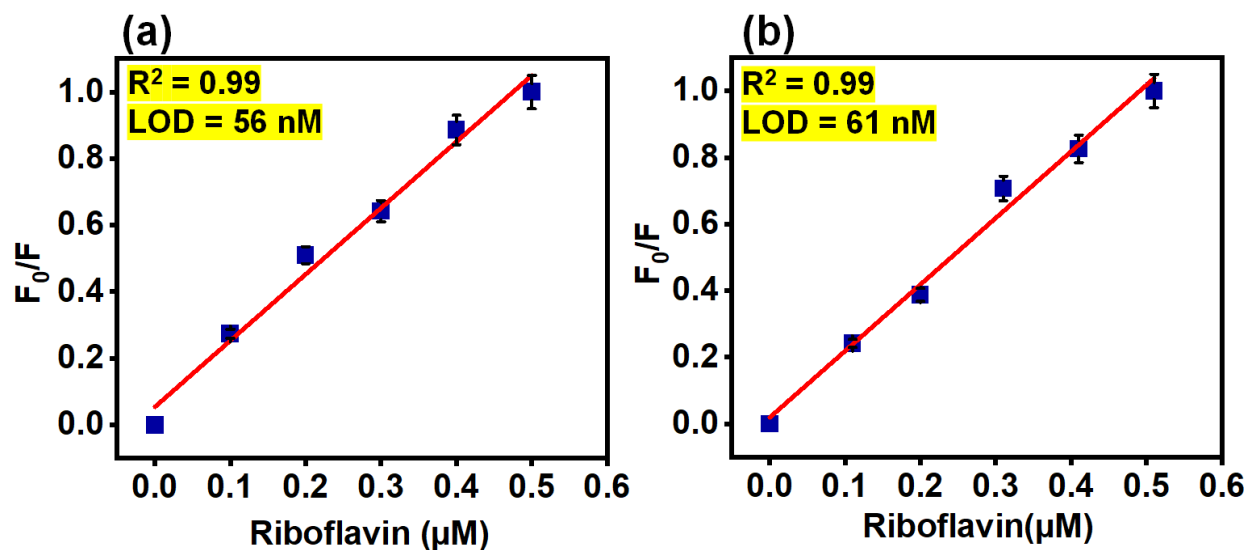

**Figure S8.** Linear relationship of fluorescence response ( $F_0/F$ ) of N-CQDs with different concentrations of RF (0-2.2  $\mu\text{M}$ ) in (a) HEPES buffer at pH 7.4, (b) real sample of Vitamin B<sub>2</sub>. The parameters ' $F_0$ ' and ' $F$ ' indicate the fluorescence intensity in the absence and presence of vitamin B<sub>2</sub>, respectively. LOD signifies limit of detection. The red line indicates the linear fit of the data using OriginPro 2021 and  $R^2$  denotes the goodness of the fits. Error bars represents standard error of measurements obtained from three independent experiments. See Experimental Section for all the required details.

**Table S1****Table S1:** Details of various parameters obtained during the deconvolution of the XPS data

| <b>Elements</b> | <b>Peak position<br/>(functional groups<br/>present)</b> | <b>No. of<br/>deconvoluted<br/>spectra</b> | <b>Relative population<br/>(Peak Area %)</b> |
|-----------------|----------------------------------------------------------|--------------------------------------------|----------------------------------------------|
| Carbon (C1s)    | 283.3 eV (-C=C, -C-C),                                   | 3                                          | 45                                           |
|                 | 285.3 eV (C=N, -C=O),                                    |                                            | 42                                           |
|                 | 287.2 eV (-O-C=O)                                        |                                            | 13                                           |
| Oxygen (O1s)    | 531.8 eV (-C=O, -C-O-C)                                  | 1                                          | 100                                          |
| Nitrogen (N1s)  | 399.3 eV (-C-N-C),                                       | 2                                          | 93                                           |
|                 | 401.1 eV (-C <sub>3</sub> N)                             |                                            | 7                                            |

**Table S2**

**Table S2:** Fluorescence lifetime components of N-CQDs and their respective coefficients along with the mean fluorescence lifetimes in aqueous and pH 7.4 medium. The lifetimes were extracted by fitting the time-resolved emission decays using a tri-exponential function.  $\chi^2$  represents the goodness of the fits.

| <b>System</b>                                         | <b><math>\tau_1</math> (ns)<br/>(<math>\alpha_1</math>)</b> | <b><math>\tau_2</math> (ns)<br/>(<math>\alpha_2</math>)</b> | <b><math>\tau_3</math> (ns)<br/>(<math>\alpha_3</math>)</b> | <b><math>\tau_m^{\#}</math>(ns)</b> | <b><math>\chi^2</math></b> |
|-------------------------------------------------------|-------------------------------------------------------------|-------------------------------------------------------------|-------------------------------------------------------------|-------------------------------------|----------------------------|
| N-CQDs (aqueous medium)                               | 0.95<br>(0.57)                                              | 3.06<br>(0.36)                                              | 8.76<br>(0.07)                                              | 2.26                                | 1.13                       |
| N-CQDs (aqueous medium) +RF                           | 0.99<br>(0.72)                                              | 1.79<br>(0.23)                                              | 7.90<br>(0.05)                                              | 1.55                                | 1.13                       |
| N-CQDs + real sample of vitamin B <sub>2</sub> tablet | 0.68<br>(0.69)                                              | 2.68<br>(0.26)                                              | 8.49<br>(0.05)                                              | 1.60                                | 1.12                       |
| N-CQDs (HEPES buffer pH 7.4)                          | 1.00<br>(0.60)                                              | 3.27<br>(0.33)                                              | 9.30<br>(0.06)                                              | 2.24                                | 1.08                       |
| N-CQDs (HEPES buffer pH 7.4) + RF                     | 0.68<br>(0.72)                                              | 2.78<br>(0.23)                                              | 8.80<br>(0.05)                                              | 1.57                                | 1.13                       |

$$\# \tau_m = \alpha_1\tau_1 + \alpha_2\tau_2 + \alpha_3\tau_3$$

**Table S3****Table S3:** Application of the developed nanosensor for detection of real sample of RF in Tablet

| <b>Conc. added<br/>(<math>\mu\text{M}</math>)</b> | <b>Conc. detected<br/>(<math>\mu\text{M}</math>)</b> | <b>Recovery rate</b> | <b>Recovery error</b> | <b>Relative standard<br/>deviation (RSD)</b> |
|---------------------------------------------------|------------------------------------------------------|----------------------|-----------------------|----------------------------------------------|
| 0.5                                               | 0.48                                                 | 93%                  | 4%                    | 2.3                                          |
| 1.42                                              | 1.39                                                 | 97%                  | 2%                    | 2.3                                          |
| 2.2                                               | 2.19                                                 | 99%                  | 0.4%                  | 0.3                                          |
